# Supplementary material
Source: PubMed Central journal article supplement (PMC5936623)

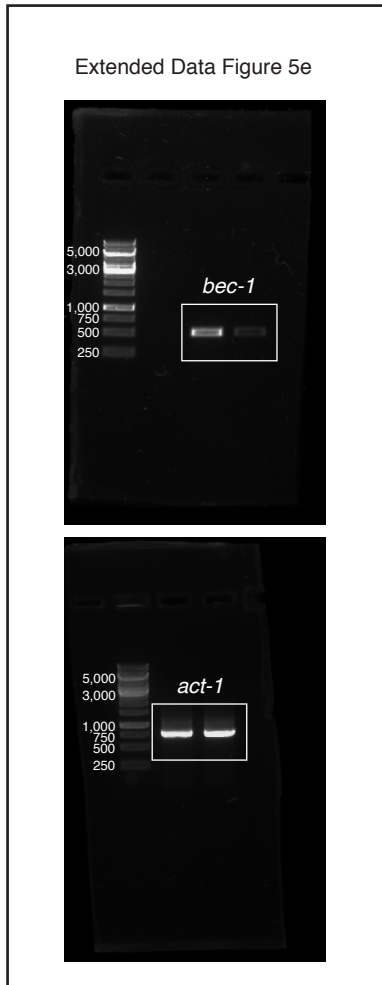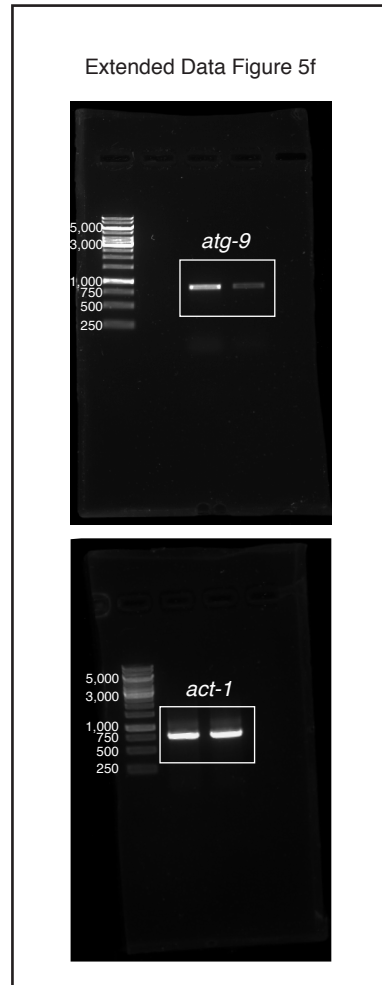

Supplementary Figure 1. Uncropped images of DNA gels.

Supplement: NIHMS938429-supplement-supplement_1.pdf [file NIHMS938429-supplement-supplement_1.pdf]
